# Supplementary material
Source: publisher site journal article supplement (https://www.dovepress.com/article/408855)
Supplement: Supplementary file 1 [file get_supplementary_file.php]

***Supporting Information for***

**Multifunctional Nanoplatform-Mediated Chemo-Photothermal Therapy Combines Immunogenic Cell Death with Checkpoint Blockade to Combat** **Triple-Negative Breast Cancer and Distant Metastasis**

Hui Zhu1,2, Ke Yang3, Huan Yao1, Xueying Chen1, Shujin Yan1,2, Yiman He1,2, Yang Cao2, Jie Luo*1, Dong Wang*1

1Department of Ultrasound, The First Affiliated Hospital of Chongqing Medical University, Chongqing, P. R. China.

2Chongqing Key Laboratory of Ultrasound Molecular Imaging, Chongqing, P. R. China.

3Pediatric Research Institute, Children’s Hospital of Chongqing Medical University, Chongqing, P. R. China.

Correspondence:

*Jie Luo

Department of Ultrasound, The First Affiliated Hospital of Chongqing Medical University, 1 Youyi Road, Yuzhong District, Chongqing 400042, P. R. China.

Email: [luojie1983@cqmu.edu.cn](mailto:luojie1983@cqmu.edu.cn)

*Wang Dong

Department of Ultrasound, The First Affiliated Hospital of Chongqing Medical University, 1 Youyi Road, Chongqing 400042, P. R. China.

Email: [wangdong4429@cqmu.edu.cn](mailto:wangdong4429@cqmu.edu.cn)


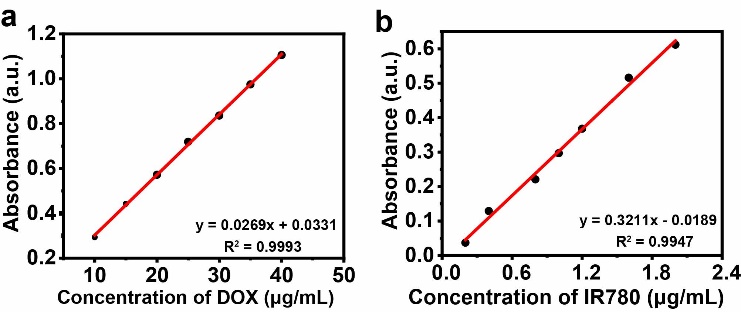


**Figure S1** a) UV-vis absorbance standard curve of DOX at different concentration from 10 to 40 μg/mL. b) UV-vis absorbance standard curve of IR780 at different concentration from 0.2 to 2.0 μg/mL.


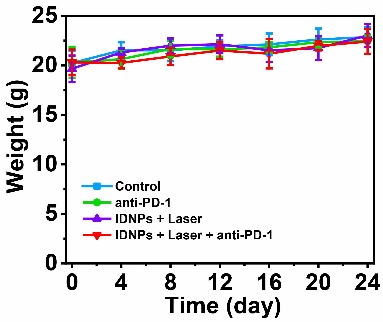


**Figure S2** Body weight of mice after various treatments.
